# Supplementary material for: Highly active and stable fungal ice nuclei are widespread among Fusarium species
Source: Copernicus journal article supplement (doi:10.5194/bg-2019-276), 2019-07-31
Supplement: Supplementary file [file bg-2019-276-AC2-supplement.pdf]

1 **MS bg-2019-276, Kunert et al.: Highly active and stable fungal ice nuclei are widespread**  
2 **among *Fusarium* species**

3  
4 We thank referee #2 for his/her constructive comments and suggestions, which are highly  
5 appreciated and have been taken into account upon revision of our manuscript. The comments  
6 and our answers are listed below (referee's comments marked with blue letters).

7  
8 Specific comments:

9  
10 Abstract:

11  
12 Referee comment: Indicate the biological relevance of *Fusarium* and its ice nucleation activity.  
13 This is discussed well in the introduction but will help to bridge the first few sentences of the  
14 abstract.

15 Author's response: We thank the referee for this suggestion and included the following  
16 sentences in the abstract: "Ice nucleation activity in fungi was first discovered in the  
17 cosmopolitan genus *Fusarium*, which is widespread in soil and plants, has been found in  
18 atmospheric aerosol and cloud water samples, and can be regarded as the best studied IN-active  
19 fungus."

20  
21 Moreover, we modified the following sentences: "The frequency and distribution of ice  
22 nucleation activity within *Fusarium*, however, remains elusive. Here, we tested more than 100  
23 strains from 65 different *Fusarium* species for ice nucleation activity."

24  
25 Methods 2.1:

26  
27 Referee comment: How were the initial samples obtained? Could their original environment  
28 (crop vs. airborne, etc.) shed light on IN frequency?

29 Author's response: Samples from the USDA-ARS/Michigan State University were collected  
30 from crop tissue (sugar beet), and samples from the Schmale Laboratory at Virginia Tech were  
31 collected with unmanned aircraft systems. There is no detailed information available for the  
32 sources of the strains for the Kansas State University Teaching collection. We found IN activity  
33 in isolates from crop and air samples. For the air samples we cannot draw any conclusions from  
34 their original environment. A controlled comparison of IN frequency from samples collected in  
35 the air versus crop plants (and maybe even different types of crop plants) would be important,  
36 now that more IN-active species are known.

37  
38 However, we added the following paragraph to section 2.1: "The strains from the USDA-  
39 ARS/Michigan State University were collected from crop tissue (sugar beet). All isolates were  
40 from field-grown beets and were obtained by hyphal tip transfer. The strains from the Schmale  
41 Laboratory at Virginia Tech were collected with unmanned aircraft systems (UASs or drones)  
42 equipped with remotely-operated sampling devices containing a *Fusarium* selective medium  
43 (e.g., Lin et al., 2013, 2014). All of the Schmale Laboratory strains were collected 100 m above  
44 ground level at the Kentland Farm in Blacksburg, Virginia, USA. Detailed information is not  
45 available for the sources of the strains for the Kansas State University Teaching collection.  
46 However, some of these strains are holotype strains referenced in Leslie and Summerell  
47 (2006)."

48  
49 We extended Table S1 and provided additional information about sampling location and date.  
50

51 Referee comment: Line 21: Additional, more recent, studies have contributed to this  
52 understanding of IN as well. (Failor et. al. 2017, Hanlon et al. 2017, Stopelli et al. 2017, 2015,  
53 Joly et al. 2014).

54 Author's response: We thank the referee for this remark and added the references to our  
55 manuscript.

56  
57 Referee comment: Line 24-6: Failor et al. (2017) further expanded on known  
58 *gammaproteobacteria* IN.

59 Author's response: We changed the sentences as follows: "The best characterized biological IN  
60 are common plant-associated bacteria of the genera *Pseudomonas*, *Pantoea*, and *Xanthomonas*  
61 (Garnham et al., 2011; Govindarajan and Lindow, 1988; Graether and Jia, 2001; Green and  
62 Warren, 1985; Hill et al., 2014; Kim et al., 1987; Ling et al., 2018; Schmid et al., 1997; Wolber  
63 et al., 1986), and recently, an ice nucleation-active (IN-active) *Lysinibacillus* was found (Failor  
64 et al., 2017). The first identified IN-active fungi were strains of the genus *Fusarium* (Hasegawa  
65 et al., 1994, Pouleur et al., 1992, Richard et al., 1996, Tsumuki et al., 1992)."

66  
67 Referee comment: Line 118: Was the range of incubation times necessary to reach a specified  
68 optical density? If so, that indication would be useful. If not, elaborate of reasoning for the  
69 times.

70 Author's response: Here, we did not mean that we tested these different incubation times. The  
71 sentence was meant to indicate the procedure considering all of the different replications that  
72 we used. For clarification, we changed "incubated" to "equilibrated".

73  
74 Referee comment: Line 119: Be specific for the 0.5°C freezing point depression. Is it 0.5°C or  
75 0.5±x °C.

76 Author's response: We added the calculations to the supplementary information.

77  
78 We modified the sentence: "Note, that the aqueous extracts were prepared in 0.9 % NaCl  
79 solution, which could reduce the freezing temperatures by 0.5 °C based on theoretical  
80 calculations."

81  
82 Results 3.1:

83  
84 Referee comment: This would be an interesting point to note the original sampling locations  
85 for the various strains and could further demonstrate the cosmopolitan nature of these IN-active  
86 species should any tends be identified.

87 Author's response: We thank the referee for this comment, but as described before, we had only  
88 a few different sampling locations for both, the USDA-ARS/Michigan State University and  
89 samples from the Schmale Laboratory at Virginia Tech. For samples from the Kansas State  
90 University, we cannot specify the original sampling locations further as we obtained these  
91 samples from a culture collection.

92  
93 Referee comment: Lines 154-5: This is a risky assumption to make. Prior to the Failor et al.  
94 study, all bacterial IN were thought to be proteinaceous. Exposing a selection of the species to  
95 high heat could support this claim.

96 Author's response: As many earlier studies already performed experiments with heat treatment  
97 of *Fusarium* IN, we initially refrained from repeating these experiments. The studies of  
98 Hasegawa et al. (1994), Pouleur et al. (1992), and Tsumuki and Konno (1994) only investigated  
99 some species of the genus *Fusarium*, and we agree with the referee that it is risky to generalize  
100 these findings to the newly found IN-active *Fusarium* species. Based on the suggestion of

101 referee #2 and #3, we performed additional heat treatment experiments with four different  
102 *Fusarium* species: *F. acuminatum*, *F. armeniacum*, *F. avenaceum*, and *F. langsethiae*.

103  
104 We added a new Figure 4, and renumbered the other figures.

105  
106 We included the following sentence in the abstract: “Heat treatment at 40 °C to 98 °C, however,  
107 strongly reduced the observed IN concentrations, confirming earlier hypotheses that the INM  
108 in *Fusarium* largely consists of a proteinaceous compound.”

109  
110 We modified the following sentence in the introduction: “Furthermore, the stability of  
111 *Fusarium* IN upon exposure to ozone and nitrogen dioxide, under high and low or quickly  
112 changing temperatures, and after short- and long-term storage under various conditions was  
113 investigated.”

114  
115 We modified the following sentence in section 2.1: “For quantitative analysis, exposure  
116 experiments, heat treatments, freeze-thaw cycles, as well as short- and long-term storage tests  
117 a selection of IN-active tested strains was grown on full-strength potato dextrose agar (VWR  
118 International GmbH, Darmstadt, Germany) first at room temperature for four to six days and  
119 then at 6 °C for about four weeks.”

120  
121 We included the following sentences in section 2.2: “For heat treatment experiments, aliquots  
122 of aqueous extracts of *F. acuminatum* 3-68, *F. armeniacum* 20970, *F. avenaceum* 2-106, and  
123 *F. langsethiae* 19084 were incubated at 40 °C, 70 °C, and 98 °C, respectively, for one hour.  
124 The IN concentration was determined using TINA.”

125  
126 We changed the following sentences in section 3.3: “They can be exposed to chemically  
127 modifying agents like ozone and nitrogen dioxide, and physical stressors like high and low or  
128 quickly changing temperatures. To investigate the stability of *Fusarium* IN, we performed  
129 exposure experiments, heat treatments, freeze-thaw cycles, and long-term storage tests.”

130  
131 We included a new paragraph in section 3.3: “The stability of the INM in *Fusarium* was  
132 investigated in heat treatment experiments. The ice nucleation activity was reduced  
133 significantly at a 40 °C treatment (Fig. 4). Between 40 % and 90 % of IN were lost at this  
134 temperature depending on the species, which supports the hypothesis that the INM in *Fusarium*  
135 consists of a proteinaceous compound. A heat treatment at 70 °C reduced the ice nucleation  
136 activity to less than 0.01 % compared to the initial level. Moreover, the initial freezing  
137 temperature was shifted to lower temperatures indicating a breakdown of the large protein  
138 aggregates. After a 98 °C treatment, we still found ice nucleation activity for all investigated  
139 species except for *F.avenaceum* 2-106. The results are in agreement with previous studies,  
140 which also reported a reduction in ice nucleation activity with increasing temperature in heat  
141 treatment experiments (Hasegawa et al., 1994; Pouleur et al., 1992; Tsumuki and Konno, 1994).  
142 The remaining activity after the 98 °C treatment, however, could indicate that post-translational  
143 modifications like glycosylation and therefore polysaccharides could play a role in the ice  
144 nucleation activity of *Fusarium*. Further systematic and chemical analysis studies are needed  
145 for elucidation.”

146  
147 We included the following sentences in the conclusion: “A heat treatment of 40 °C reduced the  
148 IN concentration significantly, supporting the hypothesis that the INM in *Fusarium* largely  
149 consists of a proteinaceous compound. An involvement of polysaccharides, however, cannot  
150 be excluded.”

151

152 Referee comment: Lines 184-6: With the drastic decrease in activity after the 300,000 MWCO  
153 filter and then again after 100,000, could the protein not be larger, but when damaged or broken  
154 still retains some ice nucleation activity?

155 Author's response: If the INM in *Fusarium* is a single large protein, which breaks into small  
156 parts upon filtration, we would expect based on Govindarajan and Lindow (1988) and Pummer  
157 et al. (2015) a much lower initial freezing temperature of the filtrate than the temperature, which  
158 we obtained in our experiments. The only small shift in the initial freezing temperature after  
159 filtration suggests that small IN reassemble again to larger aggregates with similar activity than  
160 before filtration. It is unlikely that a damaged or broken IN protein would show a similar activity  
161 even if the broken parts would aggregate.

162  
163 Referee comment: Lines 195-6: Why would single proteins in the atmosphere be unlikely?  
164 Please elaborate on this statement.

165 Author's response: As hypothesized in Lines 184-185, the proteins tend to agglomerate, which  
166 make it unlikely that individual proteins will enter the atmosphere. However; if an individual  
167 protein would enter the atmosphere it would be in the nucleation mode size range of ~ 6 nm.  
168 These particles tend to grow by condensation of gaseous compounds (e.g., semi volatile organic  
169 compounds, sulfates, water) and grow to particles in the Aitken mode size range. In this size  
170 range further condensation and coagulation takes place and larger agglomerates are formed.

171  
172 We included the following sentence to our manuscript: "Individual proteins with a diameter of  
173 ~ 6 nm which may enter the atmosphere would be in the nucleation mode size range, where  
174 particles tend to uptake gaseous compounds and grow to Aitken mode particles, which  
175 themselves tend to coagulate to larger agglomerates (Seinfeld and Pandis, 1998)."

176  
177 Referee comment: Line 216: Change ". . .and the fungus could safe energy." to ". . .and the  
178 fungus could save energy."

179 Author's response: Changed as suggested.

180  
181 Referee comment: Figure 1. Inclusion of the positive control SnoMax curve would be beneficial  
182 here. Any incidence of spontaneous freezing of the negative control should also be noted (if  
183 any occurred with the methods you used).

184 Author's response: As the focus of this study is on fungal IN of *Fusarium*, we did not use  
185 Snomax in any of the TINA experiments. The *Fusarium* strains themselves served as positive  
186 controls based on the results of the initial screening (Table S1). Moreover, the correct  
187 functionality of TINA including a Snomax curve is presented in Kunert et al. (2018).

188  
189 For freezing tests, however, a negative control is essential. We added the information about the  
190 negative controls and included the following sentences in the manuscript:

191  
192 For the thermal cyler: "Aliquots of uninoculated DPY broth were used as negative controls,  
193 which did not freeze in the investigated temperature interval."

194  
195 For LINDA experiments: "As a negative control, a 0.9 % NaCl solution was added to three  
196 uninoculated agar plates, and the freezing started below -14 °C."

197  
198 For TINA experiments: "Pure water samples (0.1 µm filtered) served as a negative control for  
199 each experiment. These did not freeze in the observed temperature interval."

200

201 *Pseudomonas syringae* CC94 was used as positive control for the initial screening using  
202 LINDA as droplet freezing assay. We included the following sentence in section 2.3: “The  
203 freezing temperatures ranged from -3.46 °C to -4.58 °C.”  
204

205 Referee comment: Figure 3. You note in the text that SnoMax has been shown to decrease after  
206 exposure. Did you see this same result, or did you not use SnoMax because of this interaction?

207 Author’s response: We showed in a previous study that the IN activity of Snomax decreased  
208 after exposure to O<sub>3</sub> and NO<sub>2</sub> (Kunert et al. 2018). As this manuscript is focused on the IN  
209 activity of *Fusarium*, we refrained from repeating the experiments.  
210

211 References:

212  
213 Govindarajan, A. G. and Lindow, S. E.: Size of bacterial ice-nucleation sites measured *in situ*  
214 by radiation inactivation analysis, Proceedings of the National Academy of Sciences of the  
215 United States of America, 85, 1334–1338, 1988.  
216

217 Hasegawa, Y., Ishihara, Y., and Tokuyama, T.: Characteristics of ice-nucleation activity in  
218 *Fusarium avenaceum* IFO 7158, Bioscience, Biotechnology, and Biochemistry, 58, 2273–  
219 2274, 1994.  
220

221 Kunert, A. T., Lamneck, M., Helleis, F., Pöhlker, M. L., Pöschl, U., and Fröhlich-Nowoisky,  
222 J.: Twin-plate ice nucleation assay (TINA) with infrared detection for high-throughput droplet  
223 freezing experiments with biological ice nuclei in laboratory and field samples, Atmospheric  
224 Measurement Techniques, 11, 6327–6337, 2018.  
225

226 Pouleur, S., Richard, C., Martin, J.-G., and Antoun, H.: Ice nucleation activity in *Fusarium*  
227 *acuminatum* and *Fusarium avenaceum*, Applied and Environmental Microbiology, 1992.  
228

229 Pummer, B. G., Budke, C., Niedermeier, D., Felgitsch, L., Kampf, C. J., Huber, R. G., Liedl,  
230 K. R., Loerting, T., Moschen, T., Schauperl, M., Tollinger, M., Morris, C. E., Wex, H., Grothe,  
231 H., Pöschl, U., Koop, T., and Fröhlich-Nowoisky, J.: Ice nucleation by water-soluble  
232 macromolecules, Atmospheric Chemistry and Physics, 15, 4077–4091, 2015.  
233

234 Stopelli, E., Conen, F., Zimmermann, L., Alewell, C., and Morris, C. E.: Freezing nucleation  
235 apparatus puts new slant on study of biological ice nucleators in precipitation, Atmospheric  
236 Chemistry and Physics, 7, 129–134, 2014.  
237

238 Tsumuki, H. and Konno, H.: Ice nuclei produced by *Fusarium* sp. isolated from the gut of the  
239 rice stem borer, *Chilo suppressalis* Walker (Lepidoptera: Pyralidae), Bioscience,  
240 Biotechnology, Biochemistry, 1994.  
241
